# Supplementary material for: The complete plastomes of red fleshed pitaya (Selenicereus monacanthus) and three related Selenicereus species: insights into gene losses, IR expansions and phylogenomic implications
Source: Research Square preprint supplement (doi:10.21203/rs.3.rs-373541/v1), 2021-04-01
Supplement: Supplementary file 1 [file 3816ef9f7a9a2e295c7b922e.xlsx]

## Sheet: Table S2
Table S2 Repeats (>= 30bp) identified in the four Selenicereus species.
Species	Repeat length（bp）	Repeat units I start	Repeat units I end	Repeat types	Repeat units II start	Repeat units II end	Repeat interval	E-value
S. anthonyanus	21674	68203	89876	P	111643	133316	0	0
S. anthonyanus	415	54453	54867	F	72147	72561	-3	2.23e-232
S. anthonyanus	415	54453	54867	P	128958	129372	-3	2.23e-232
S. anthonyanus	256	34808	35063	P	107452	107707	0	3.73e-145
S. anthonyanus	212	54114	54325	F	71726	71937	-1	7.34e-116
S. anthonyanus	212	54114	54325	P	129582	129793	-1	7.34e-116
S. anthonyanus	205	42767	42971	F	42848	43052	-3	7.22e-107
S. anthonyanus	204	42783	42986	F	42864	43067	-3	2.85e-106
S. anthonyanus	162	42767	42928	F	42929	43090	-3	2.75e-81
S. anthonyanus	161	42840	43000	F	42921	43081	-3	1.08e-80
S. anthonyanus	144	73375	73518	F	73493	73636	0	1.01e-77
S. anthonyanus	144	73375	73518	P	127883	128026	0	1.01e-77
S. anthonyanus	144	73493	73636	P	128001	128144	0	1.01e-77
S. anthonyanus	144	127883	128026	F	128001	128144	0	1.01e-77
S. anthonyanus	146	42783	42928	F	42945	43090	-2	5.98e-74
S. anthonyanus	131	41839	41969	F	41890	42020	0	6.75e-70
S. anthonyanus	141	54322	54462	F	72017	72157	-3	7.94e-69
S. anthonyanus	141	54322	54462	P	129362	129502	-3	7.94e-69
S. anthonyanus	110	40814	40923	F	40871	40980	-1	9.79e-55
S. anthonyanus	113	43743	43855	F	43770	43882	-3	2.93e-52
S. anthonyanus	100	40824	40923	F	40881	40980	0	3.11e-51
S. anthonyanus	110	43847	43956	F	43901	44010	-3	1.73e-50
S. anthonyanus	102	43388	43489	F	43409	43510	-1	5.95e-50
S. anthonyanus	102	66785	66886	F	66806	66907	-1	5.95e-50
S. anthonyanus	105	43751	43855	F	43778	43882	-2	1.49e-49
S. anthonyanus	104	54359	54462	F	72054	72157	-2	5.86e-49
S. anthonyanus	104	54359	54462	P	129362	129465	-2	5.86e-49
S. anthonyanus	98	43886	43983	F	43913	44010	-3	2.04e-43
S. anthonyanus	80	41839	41918	F	41941	42020	0	3.42e-39
S. anthonyanus	89	42921	43009	F	43002	43090	-3	4e-38
S. anthonyanus	81	43388	43468	F	43430	43510	-1	2.08e-37
S. anthonyanus	86	43743	43828	F	43797	43882	-3	2.31e-36
S. anthonyanus	81	66785	66865	F	66827	66907	-2	2.49e-35
S. anthonyanus	71	43913	43983	F	43940	44010	0	8.97e-34
S. anthonyanus	71	54392	54462	F	72087	72157	0	8.97e-34
S. anthonyanus	71	54392	54462	P	129362	129432	0	8.97e-34
S. anthonyanus	78	43751	43828	F	43805	43882	-2	1.48e-33
S. anthonyanus	78	43832	43909	F	43886	43963	-2	1.48e-33
S. anthonyanus	80	93062	93141	F	93122	93201	-3	7.59e-33
S. anthonyanus	67	42536	42602	F	42554	42620	0	2.3e-31
S. anthonyanus	72	42767	42838	F	43010	43081	-3	3.61e-28
S. anthonyanus	71	43859	43929	F	43940	44010	-3	1.38e-27
S. anthonyanus	60	66827	66886	F	66848	66907	0	3.76e-27
S. anthonyanus	70	43240	43309	F	43336	43405	-3	5.3e-27
S. anthonyanus	59	93083	93141	F	93143	93201	0	1.5e-26
S. anthonyanus	60	43388	43447	F	43451	43510	-1	6.77e-25
S. anthonyanus	60	66806	66865	F	66848	66907	-1	6.77e-25
S. anthonyanus	63	66782	66844	F	66845	66907	-2	1.03e-24
S. anthonyanus	62	41704	41765	F	41770	41831	-2	4e-24
S. anthonyanus	65	42783	42847	F	43026	43090	-3	4.33e-24
S. anthonyanus	63	43847	43909	F	43928	43990	-3	6.3e-23
S. anthonyanus	53	40814	40866	F	40928	40980	-1	9.8e-21
S. anthonyanus	59	43743	43801	F	43824	43882	-3	1.32e-20
S. anthonyanus	49	42536	42584	F	42572	42620	0	1.58e-20
S. anthonyanus	57	93050	93106	F	93140	93196	-3	1.9e-19
S. anthonyanus	54	43859	43912	F	43967	44020	-2	1.98e-19
S. anthonyanus	47	42135	42181	F	42162	42208	0	2.52e-19
S. anthonyanus	56	43847	43902	F	43955	44010	-3	7.21e-19
S. anthonyanus	53	43292	43344	F	43493	43545	-2	7.64e-19
S. anthonyanus	46	35444	35489	F	35486	35531	0	1.01e-18
S. anthonyanus	51	43751	43801	F	43832	43882	-2	1.13e-17
S. anthonyanus	51	93056	93106	F	93086	93136	-2	1.13e-17
S. anthonyanus	44	43913	43956	F	43967	44010	0	1.62e-17
S. anthonyanus	43	40824	40866	F	40938	40980	0	6.46e-17
S. anthonyanus	51	43859	43909	F	43886	43936	-3	5.54e-16
S. anthonyanus	47	73323	73369	F	73446	73492	-2	2.46e-15
S. anthonyanus	47	73323	73369	F	73564	73610	-2	2.46e-15
S. anthonyanus	47	73323	73369	P	127909	127955	-2	2.46e-15
S. anthonyanus	47	73323	73369	P	128027	128073	-2	2.46e-15
S. anthonyanus	47	73446	73492	P	128150	128196	-2	2.46e-15
S. anthonyanus	47	73564	73610	P	128150	128196	-2	2.46e-15
S. anthonyanus	47	127909	127955	F	128150	128196	-2	2.46e-15
S. anthonyanus	47	128027	128073	F	128150	128196	-2	2.46e-15
S. anthonyanus	49	93945	93993	F	93994	94042	-3	7.85e-15
S. anthonyanus	39	66827	66865	F	66869	66907	0	1.65e-14
S. anthonyanus	42	43268	43309	F	43364	43405	-1	3.26e-14
S. anthonyanus	42	66782	66823	F	66866	66907	-1	3.26e-14
S. anthonyanus	45	43308	43352	F	43356	43400	-2	3.6e-14
S. anthonyanus	38	89818	89855	F	89851	89888	0	6.62e-14
S. anthonyanus	38	89851	89888	P	111664	111701	0	6.62e-14
S. anthonyanus	36	54290	54325	F	71902	71937	0	1.06e-12
S. anthonyanus	36	54290	54325	P	129582	129617	0	1.06e-12
S. anthonyanus	39	43388	43426	F	43472	43510	-1	1.94e-12
S. anthonyanus	39	66806	66844	F	66869	66907	-1	1.94e-12
S. anthonyanus	40	43751	43790	F	43886	43925	-2	2.9e-11
S. anthonyanus	40	43778	43817	F	43886	43925	-2	2.9e-11
S. anthonyanus	40	43805	43844	F	43886	43925	-2	2.9e-11
S. anthonyanus	37	42892	42928	F	43054	43090	-1	2.94e-11
S. anthonyanus	33	32784	32816	F	32804	32836	0	6.77e-11
S. anthonyanus	33	41733	41765	F	41799	41831	0	6.77e-11
S. anthonyanus	42	43260	43301	F	43308	43349	-3	8.01e-11
S. anthonyanus	42	52377	52418	F	52401	52442	-3	8.01e-11
S. anthonyanus	39	41781	41819	F	41862	41900	-2	1.1e-10
S. anthonyanus	39	41781	41819	F	41913	41951	-2	1.1e-10
S. anthonyanus	39	41781	41819	F	41964	42002	-2	1.1e-10
S. anthonyanus	41	66795	66835	R	66805	66845	-3	2.98e-10
S. anthonyanus	35	91326	91360	F	91350	91384	-1	4.45e-10
S. anthonyanus	31	42536	42566	F	42590	42620	0	1.08e-09
S. anthonyanus	40	66785	66824	R	66795	66834	-3	1.1e-09
S. anthonyanus	37	42811	42847	F	43054	43090	-2	1.59e-09
S. anthonyanus	37	42973	43009	F	43054	43090	-2	1.59e-09
S. anthonyanus	37	74679	74715	F	77575	77611	-2	1.59e-09
S. anthonyanus	37	74679	74715	P	123908	123944	-2	1.59e-09
S. anthonyanus	37	77575	77611	P	126804	126840	-2	1.59e-09
S. anthonyanus	37	123908	123944	F	126804	126840	-2	1.59e-09
S. anthonyanus	39	30027	30065	P	109049	109087	-3	4.08e-09
S. anthonyanus	30	31740	31769	F	73057	73086	0	4.34e-09
S. anthonyanus	30	31740	31769	P	128433	128462	0	4.34e-09
S. anthonyanus	36	43766	43801	F	43901	43936	-2	6e-09
S. anthonyanus	36	43793	43828	F	43901	43936	-2	6e-09
S. anthonyanus	36	43820	43855	F	43901	43936	-2	6e-09
S. anthonyanus	38	43356	43393	F	43509	43546	-3	1.51e-08
S. anthonyanus	34	43268	43301	F	43316	43349	-2	8.55e-08
S. anthonyanus	36	25009	25044	F	27233	27268	-3	2.04e-07
S. anthonyanus	36	43847	43882	F	43874	43909	-3	2.04e-07
S. anthonyanus	33	18040	18072	R	18040	18072	-2	3.22e-07
S. anthonyanus	30	41838	41867	F	41991	42020	-1	3.9e-07
S. anthonyanus	30	73343	73372	F	73466	73495	-1	3.9e-07
S. anthonyanus	30	73343	73372	F	73584	73613	-1	3.9e-07
S. anthonyanus	30	73343	73372	P	127906	127935	-1	3.9e-07
S. anthonyanus	30	73343	73372	P	128024	128053	-1	3.9e-07
S. anthonyanus	30	73466	73495	P	128147	128176	-1	3.9e-07
S. anthonyanus	30	73584	73613	P	128147	128176	-1	3.9e-07
S. anthonyanus	35	41715	41749	F	41862	41896	-3	7.48e-07
S. anthonyanus	35	41715	41749	F	41913	41947	-3	7.48e-07
S. anthonyanus	35	41715	41749	F	41964	41998	-3	7.48e-07
S. anthonyanus	34	67060	67093	F	80985	81018	-3	2.74e-06
S. anthonyanus	34	67060	67093	P	120501	120534	-3	2.74e-06
S. anthonyanus	34	91335	91368	F	91347	91380	-3	2.74e-06
S. anthonyanus	30	48719	48748	R	48719	48748	-2	1.7e-05
S. anthonyanus	30	66816	66845	R	66816	66845	-2	1.7e-05
S. anthonyanus	30	73375	73404	F	73611	73640	-2	1.7e-05
S. anthonyanus	30	73375	73404	P	127879	127908	-2	1.7e-05
S. anthonyanus	30	73611	73640	P	128115	128144	-2	1.7e-05
S. anthonyanus	30	74688	74717	F	77584	77613	-2	1.7e-05
S. anthonyanus	30	74688	74717	P	123906	123935	-2	1.7e-05
S. anthonyanus	30	77584	77613	P	126802	126831	-2	1.7e-05
S. anthonyanus	30	127879	127908	F	128115	128144	-2	1.7e-05
S. anthonyanus	32	21714	21745	P	73057	73088	-3	3.63e-05
S. anthonyanus	32	21714	21745	F	128431	128462	-3	3.63e-05
S. anthonyanus	32	43743	43774	F	43851	43882	-3	3.63e-05
S. anthonyanus	32	43743	43774	F	43905	43936	-3	3.63e-05
S. anthonyanus	31	22764	22794	P	70853	70883	-3	0.000132
S. anthonyanus	31	22764	22794	F	130636	130666	-3	0.000132
S. anthonyanus	31	66805	66835	R	66826	66856	-3	0.000132
S. anthonyanus	30	21716	21745	P	31740	31769	-3	0.000475
S. anthonyanus	30	28483	28512	R	76531	76560	-3	0.000475
S. anthonyanus	30	28483	28512	C	124959	124988	-3	0.000475
S. anthonyanus	30	30043	30072	P	109042	109071	-3	0.000475
S. anthonyanus	30	43268	43297	F	43517	43546	-3	0.000475
S. anthonyanus	30	66785	66814	R	66826	66855	-3	0.000475
S. anthonyanus	30	66795	66824	R	66837	66866	-3	0.000475
S. anthonyanus	30	66795	66824	R	66858	66887	-3	0.000475
S. anthonyanus	30	66805	66834	R	66848	66877	-3	0.000475
S. anthonyanus	30	66805	66834	R	66869	66898	-3	0.000475
S. anthonyanus	30	66816	66845	R	66837	66866	-3	0.000475
S. anthonyanus	30	66816	66845	R	66858	66887	-3	0.000475
S. anthonyanus	30	83766	83795	F	83802	83831	-3	0.000475
S. anthonyanus	30	83766	83795	P	117688	117717	-3	0.000475
S. anthonyanus	30	83802	83831	P	117724	117753	-3	0.000475
S. anthonyanus	30	89816	89845	P	111641	111670	-3	0.000475
S. anthonyanus	30	93965	93994	F	94014	94043	-3	0.000475
S. anthonyanus	30	111643	111672	F	111676	111705	-3	0.000475
S. anthonyanus	30	117688	117717	F	117724	117753	-3	0.000475
S. monacanthus	21677	68076	89752	P	111469	133145	0	0
S. monacanthus	415	54274	54688	F	72023	72437	-2	5.38e-235
S. monacanthus	415	54274	54688	P	128784	129198	-2	5.38e-235
S. monacanthus	208	53935	54142	F	71602	71809	-1	1.84e-113
S. monacanthus	208	53935	54142	P	129412	129619	-1	1.84e-113
S. monacanthus	210	34829	35038	P	107184	107393	-3	7.56e-110
S. monacanthus	183	34902	35084	P	107138	107320	-3	9e-94
S. monacanthus	153	40483	40635	F	40558	40710	0	3.82e-83
S. monacanthus	159	34926	35084	P	107138	107296	-2	1.06e-81
S. monacanthus	144	73250	73393	F	73368	73511	0	1e-77
S. monacanthus	144	73250	73393	P	127710	127853	0	1e-77
S. monacanthus	144	73368	73511	P	127828	127971	0	1e-77
S. monacanthus	144	127710	127853	F	127828	127971	0	1e-77
S. monacanthus	135	34950	35084	P	107138	107272	-1	1.06e-69
S. monacanthus	123	66643	66765	F	66664	66786	-1	1.63e-62
S. monacanthus	123	54159	54281	F	71909	72031	-3	3.6e-58
S. monacanthus	123	54159	54281	P	129190	129312	-3	3.6e-58
S. monacanthus	104	43253	43356	F	43274	43377	0	1.21e-53
S. monacanthus	102	66643	66744	F	66685	66786	-2	8.99e-48
S. monacanthus	90	41825	41914	F	41891	41980	-1	8.78e-43
S. monacanthus	95	41808	41902	F	41874	41968	-3	1.19e-41
S. monacanthus	83	43253	43335	F	43295	43377	0	5.33e-41
S. monacanthus	84	41954	42037	F	42068	42151	-1	3.36e-39
S. monacanthus	78	40483	40560	F	40633	40710	0	5.46e-38
S. monacanthus	84	92914	92997	F	92944	93027	-2	4.18e-37
S. monacanthus	75	92923	92997	F	92953	93027	0	3.49e-36
S. monacanthus	81	66643	66723	F	66706	66786	-3	1.96e-33
S. monacanthus	69	37506	37574	F	37573	37641	0	1.43e-32
S. monacanthus	76	42240	42315	F	42267	42342	-2	2.24e-32
S. monacanthus	67	42700	42766	F	42718	42784	0	2.29e-31
S. monacanthus	75	41732	41806	F	41798	41872	-3	6.37e-30
S. monacanthus	75	54144	54218	F	71894	71968	-3	6.37e-30
S. monacanthus	75	54144	54218	P	129253	129327	-3	6.37e-30
S. monacanthus	62	43253	43314	F	43316	43377	0	2.34e-28
S. monacanthus	68	54214	54281	F	71964	72031	-2	1.17e-27
S. monacanthus	68	54214	54281	P	129190	129257	-2	1.17e-27
S. monacanthus	60	66706	66765	F	66727	66786	0	3.75e-27
S. monacanthus	60	66685	66744	F	66727	66786	-1	6.75e-25
S. monacanthus	63	66640	66702	F	66724	66786	-2	1.03e-24
S. monacanthus	65	41742	41806	F	41874	41938	-3	4.32e-24
S. monacanthus	65	41751	41815	F	41817	41881	-3	4.32e-24
S. monacanthus	65	41756	41820	F	41888	41952	-3	4.32e-24
S. monacanthus	60	66664	66723	F	66727	66786	-2	5.98e-23
S. monacanthus	62	41759	41820	F	41825	41886	-3	2.39e-22
S. monacanthus	54	89669	89722	P	111466	111519	-1	2.49e-21
S. monacanthus	54	111466	111519	F	111499	111552	-1	2.49e-21
S. monacanthus	49	42700	42748	F	42736	42784	0	1.57e-20
S. monacanthus	51	89669	89719	F	89702	89752	-1	1.5e-19
S. monacanthus	51	89702	89752	P	111502	111552	-1	1.5e-19
S. monacanthus	54	92914	92967	F	92974	93027	-2	1.98e-19
S. monacanthus	47	43666	43712	F	43693	43739	0	2.52e-19
S. monacanthus	52	42240	42291	F	42294	42345	-2	2.93e-18
S. monacanthus	45	35040	35084	P	107138	107182	0	4.03e-18
S. monacanthus	45	92923	92967	F	92983	93027	0	4.03e-18
S. monacanthus	53	41732	41784	F	41864	41916	-3	3.89e-17
S. monacanthus	50	22890	22939	F	22966	23015	-2	4.34e-17
S. monacanthus	43	42985	43027	F	43027	43069	0	6.44e-17
S. monacanthus	41	43253	43293	F	43337	43377	0	1.03e-15
S. monacanthus	47	73198	73244	F	73321	73367	-2	2.45e-15
S. monacanthus	47	73198	73244	F	73439	73485	-2	2.45e-15
S. monacanthus	47	73198	73244	P	127736	127782	-2	2.45e-15
S. monacanthus	47	73198	73244	P	127854	127900	-2	2.45e-15
S. monacanthus	47	73321	73367	P	127977	128023	-2	2.45e-15
S. monacanthus	47	73439	73485	P	127977	128023	-2	2.45e-15
S. monacanthus	47	127736	127782	F	127977	128023	-2	2.45e-15
S. monacanthus	47	127854	127900	F	127977	128023	-2	2.45e-15
S. monacanthus	39	66706	66744	F	66748	66786	0	1.65e-14
S. monacanthus	42	66640	66681	F	66745	66786	-1	3.25e-14
S. monacanthus	47	43612	43658	F	43639	43685	-3	1.1e-13
S. monacanthus	46	42026	42071	F	42158	42203	-3	4.13e-13
S. monacanthus	36	89687	89722	P	111466	111501	0	1.06e-12
S. monacanthus	39	66664	66702	F	66748	66786	-1	1.93e-12
S. monacanthus	39	66685	66723	F	66748	66786	-1	1.93e-12
S. monacanthus	44	93776	93819	F	93825	93868	-3	5.76e-12
S. monacanthus	33	89687	89719	F	89720	89752	0	6.76e-11
S. monacanthus	33	89720	89752	P	111502	111534	0	6.76e-11
S. monacanthus	32	54111	54142	F	71778	71809	0	2.7e-10
S. monacanthus	32	54111	54142	P	129412	129443	0	2.7e-10
S. monacanthus	32	54250	54281	F	72000	72031	0	2.7e-10
S. monacanthus	32	54250	54281	P	129190	129221	0	2.7e-10
S. monacanthus	41	41742	41782	F	41940	41980	-3	2.97e-10
S. monacanthus	41	66653	66693	R	66663	66703	-3	2.97e-10
S. monacanthus	41	66653	66693	R	66684	66724	-3	2.97e-10
S. monacanthus	41	66663	66703	R	66674	66714	-3	2.97e-10
S. monacanthus	41	66674	66714	R	66684	66724	-3	2.97e-10
S. monacanthus	31	42700	42730	F	42754	42784	0	1.08e-09
S. monacanthus	31	91199	91229	F	91211	91241	0	1.08e-09
S. monacanthus	40	35454	35493	F	35467	35506	-3	1.1e-09
S. monacanthus	40	66643	66682	R	66653	66692	-3	1.1e-09
S. monacanthus	40	66643	66682	R	66674	66713	-3	1.1e-09
S. monacanthus	37	74554	74590	F	77451	77487	-2	1.58e-09
S. monacanthus	37	74554	74590	P	123734	123770	-2	1.58e-09
S. monacanthus	37	77451	77487	P	126631	126667	-2	1.58e-09
S. monacanthus	37	123734	123770	F	126631	126667	-2	1.58e-09
S. monacanthus	39	29995	30033	P	108879	108917	-3	4.07e-09
S. monacanthus	39	41732	41770	F	41930	41968	-3	4.07e-09
S. monacanthus	30	31710	31739	F	72933	72962	0	4.32e-09
S. monacanthus	30	31710	31739	P	128259	128288	0	4.32e-09
S. monacanthus	36	40699	40734	F	40738	40773	-2	5.99e-09
S. monacanthus	38	43604	43641	F	43631	43668	-3	1.5e-08
S. monacanthus	35	41786	41820	F	41852	41886	-2	2.26e-08
S. monacanthus	35	41786	41820	F	41918	41952	-2	2.26e-08
S. monacanthus	32	42263	42294	F	42317	42348	-1	2.59e-08
S. monacanthus	37	43626	43662	F	43653	43689	-3	5.54e-08
S. monacanthus	37	52197	52233	F	52221	52257	-3	5.54e-08
S. monacanthus	31	41752	41782	F	42064	42094	-1	1.01e-07
S. monacanthus	36	24976	25011	F	27200	27235	-3	2.04e-07
S. monacanthus	36	52184	52219	F	52208	52243	-3	2.04e-07
S. monacanthus	30	73218	73247	F	73341	73370	-1	3.89e-07
S. monacanthus	30	73218	73247	F	73459	73488	-1	3.89e-07
S. monacanthus	30	73218	73247	P	127733	127762	-1	3.89e-07
S. monacanthus	30	73218	73247	P	127851	127880	-1	3.89e-07
S. monacanthus	30	73341	73370	P	127974	128003	-1	3.89e-07
S. monacanthus	30	73459	73488	P	127974	128003	-1	3.89e-07
S. monacanthus	32	41751	41782	F	41949	41980	-2	1.21e-06
S. monacanthus	32	42290	42321	F	42317	42348	-2	1.21e-06
S. monacanthus	34	52168	52201	F	52192	52225	-3	2.73e-06
S. monacanthus	34	66939	66972	F	80861	80894	-3	2.73e-06
S. monacanthus	34	66939	66972	P	120327	120360	-3	2.73e-06
S. monacanthus	31	41818	41848	F	42064	42094	-2	4.52e-06
S. monacanthus	31	41884	41914	F	42064	42094	-2	4.52e-06
S. monacanthus	30	66695	66724	R	66695	66724	-2	1.69e-05
S. monacanthus	30	73250	73279	F	73486	73515	-2	1.69e-05
S. monacanthus	30	73250	73279	P	127706	127735	-2	1.69e-05
S. monacanthus	30	73486	73515	P	127942	127971	-2	1.69e-05
S. monacanthus	30	74563	74592	F	77460	77489	-2	1.69e-05
S. monacanthus	30	74563	74592	P	123732	123761	-2	1.69e-05
S. monacanthus	30	77460	77489	P	126629	126658	-2	1.69e-05
S. monacanthus	30	127706	127735	F	127942	127971	-2	1.69e-05
S. monacanthus	32	21604	21635	P	72933	72964	-3	3.62e-05
S. monacanthus	32	21604	21635	F	128257	128288	-3	3.62e-05
S. monacanthus	32	41817	41848	F	41949	41980	-3	3.62e-05
S. monacanthus	32	43228	43259	F	43381	43412	-3	3.62e-05
S. monacanthus	31	22654	22684	P	70728	70758	-3	0.000131
S. monacanthus	31	22654	22684	F	130463	130493	-3	0.000131
S. monacanthus	31	29030	29060	P	108865	108895	-3	0.000131
S. monacanthus	31	43724	43754	F	43781	43811	-3	0.000131
S. monacanthus	31	66663	66693	R	66705	66735	-3	0.000131
S. monacanthus	31	66684	66714	R	66705	66735	-3	0.000131
S. monacanthus	30	21606	21635	P	31710	31739	-3	0.000474
S. monacanthus	30	22915	22944	F	22991	23020	-3	0.000474
S. monacanthus	30	28450	28479	R	76407	76436	-3	0.000474
S. monacanthus	30	28450	28479	C	124785	124814	-3	0.000474
S. monacanthus	30	30011	30040	P	108872	108901	-3	0.000474
S. monacanthus	30	33853	33882	P	33910	33939	-3	0.000474
S. monacanthus	30	42240	42269	F	42321	42350	-3	0.000474
S. monacanthus	30	43606	43635	F	43660	43689	-3	0.000474
S. monacanthus	30	66643	66672	R	66705	66734	-3	0.000474
S. monacanthus	30	66653	66682	R	66716	66745	-3	0.000474
S. monacanthus	30	66653	66682	R	66737	66766	-3	0.000474
S. monacanthus	30	66663	66692	R	66727	66756	-3	0.000474
S. monacanthus	30	66663	66692	R	66748	66777	-3	0.000474
S. monacanthus	30	66674	66703	R	66716	66745	-3	0.000474
S. monacanthus	30	66674	66703	R	66737	66766	-3	0.000474
S. monacanthus	30	66684	66713	R	66727	66756	-3	0.000474
S. monacanthus	30	66684	66713	R	66748	66777	-3	0.000474
S. monacanthus	30	66695	66724	R	66716	66745	-3	0.000474
S. monacanthus	30	66695	66724	R	66737	66766	-3	0.000474
S. monacanthus	30	83642	83671	F	83678	83707	-3	0.000474
S. monacanthus	30	83642	83671	P	117514	117543	-3	0.000474
S. monacanthus	30	83678	83707	P	117550	117579	-3	0.000474
S. monacanthus	30	117514	117543	F	117550	117579	-3	0.000474
S. grandiflorus	21679	68839	90517	P	112532	134210	0	0
S. grandiflorus	401	55124	55524	F	72801	73201	-3	5.47e-224
S. grandiflorus	401	55124	55524	P	129848	130248	-3	5.47e-224
S. grandiflorus	256	34851	35106	P	108195	108450	-1	2.9e-142
S. grandiflorus	216	54776	54991	F	72366	72581	-1	2.96e-118
S. grandiflorus	216	54776	54991	P	130468	130683	-1	2.96e-118
S. grandiflorus	198	41999	42196	F	42089	42286	-3	1.08e-102
S. grandiflorus	177	40263	40439	F	40322	40498	0	1.38e-97
S. grandiflorus	185	42018	42202	F	42108	42292	-3	5.91e-95
S. grandiflorus	164	41991	42154	F	42081	42244	-3	1.81e-82
S. grandiflorus	156	42966	43121	F	43020	43175	-3	1.02e-77
S. grandiflorus	145	42066	42210	F	42156	42300	-3	3.42e-71
S. grandiflorus	139	43001	43139	F	43037	43175	-3	1.23e-67
S. grandiflorus	138	42966	43103	F	43038	43175	-3	4.83e-67
S. grandiflorus	126	67416	67541	F	67437	67562	0	7e-67
S. grandiflorus	118	40263	40380	F	40381	40498	0	4.59e-62
S. grandiflorus	125	42983	43107	F	43001	43125	-3	2.4e-59
S. grandiflorus	125	43001	43125	F	43019	43143	-3	2.4e-59
S. grandiflorus	121	42983	43103	F	43055	43175	-2	4.68e-59
S. grandiflorus	121	43019	43139	F	43055	43175	-2	4.68e-59
S. grandiflorus	124	42966	43089	F	43002	43125	-3	9.38e-59
S. grandiflorus	119	93679	93797	F	93709	93827	-2	7.25e-58
S. grandiflorus	122	41991	42112	F	42171	42292	-3	1.43e-57
S. grandiflorus	122	41999	42120	F	42179	42300	-3	1.43e-57
S. grandiflorus	115	43595	43709	F	43622	43736	-2	1.73e-55
S. grandiflorus	105	67416	67520	F	67458	67562	0	3.08e-54
S. grandiflorus	109	41010	41118	F	41067	41175	-2	6.37e-52
S. grandiflorus	103	43001	43103	F	43073	43175	-1	1.52e-50
S. grandiflorus	100	43610	43709	F	43637	43736	-1	9.46e-49
S. grandiflorus	107	43037	43143	F	43055	43161	-3	1.03e-48
S. grandiflorus	103	42018	42120	F	42198	42300	-2	2.33e-48
S. grandiflorus	106	42966	43071	F	43056	43161	-3	4.01e-48
S. grandiflorus	102	42966	43067	F	43074	43175	-2	9.13e-48
S. grandiflorus	105	44406	44510	F	44433	44537	-3	1.56e-47
S. grandiflorus	103	43055	43157	F	43073	43175	-3	2.35e-46
S. grandiflorus	91	35500	35590	F	35587	35677	0	8.26e-46
S. grandiflorus	101	74016	74116	F	74134	74234	-3	3.55e-45
S. grandiflorus	101	74016	74116	P	128815	128915	-3	3.55e-45
S. grandiflorus	101	74134	74234	P	128933	129033	-3	3.55e-45
S. grandiflorus	101	128815	128915	F	128933	129033	-3	3.55e-45
S. grandiflorus	100	42273	42372	F	42297	42396	-3	1.38e-44
S. grandiflorus	100	44379	44478	F	44460	44559	-3	1.38e-44
S. grandiflorus	94	54999	55092	F	72673	72766	-2	5.08e-43
S. grandiflorus	94	54999	55092	P	130283	130376	-2	5.08e-43
S. grandiflorus	84	67416	67499	F	67479	67562	0	1.35e-41
S. grandiflorus	88	43595	43682	F	43649	43736	-1	1.4e-41
S. grandiflorus	88	128828	128915	F	128946	129033	-1	1.4e-41
S. grandiflorus	85	41034	41118	F	41091	41175	-1	8.63e-40
S. grandiflorus	85	43055	43139	F	43091	43175	-1	8.63e-40
S. grandiflorus	84	42966	43049	F	43092	43175	-1	3.41e-39
S. grandiflorus	89	43894	43982	F	43975	44063	-3	4.05e-38
S. grandiflorus	85	74032	74116	F	74150	74234	-2	1.09e-37
S. grandiflorus	85	74032	74116	P	128815	128899	-2	1.09e-37
S. grandiflorus	85	74150	74234	P	128933	129017	-2	1.09e-37
S. grandiflorus	88	42966	43053	F	42984	43071	-3	1.57e-37
S. grandiflorus	82	43394	43475	F	43466	43547	-2	6.48e-36
S. grandiflorus	85	43001	43085	F	43091	43175	-3	9.03e-36
S. grandiflorus	74	44378	44451	F	44486	44559	0	1.42e-35
S. grandiflorus	73	43637	43709	F	43664	43736	0	5.68e-35
S. grandiflorus	79	42294	42372	F	42318	42396	-2	3.84e-34
S. grandiflorus	79	44378	44456	F	44405	44483	-3	2.96e-32
S. grandiflorus	78	44352	44429	F	44433	44510	-3	1.14e-31
S. grandiflorus	78	54981	55058	F	72655	72732	-3	1.14e-31
S. grandiflorus	78	54981	55058	P	130317	130394	-3	1.14e-31
S. grandiflorus	76	42273	42348	F	42321	42396	-3	1.68e-30
S. grandiflorus	64	88894	88957	F	88944	89007	0	1.49e-29
S. grandiflorus	64	88894	88957	P	114042	114105	0	1.49e-29
S. grandiflorus	64	88944	89007	P	114092	114155	0	1.49e-29
S. grandiflorus	64	114042	114105	F	114092	114155	0	1.49e-29
S. grandiflorus	67	43001	43067	F	43109	43175	-1	4.68e-29
S. grandiflorus	63	67416	67478	F	67500	67562	0	5.96e-29
S. grandiflorus	73	44460	44532	F	44487	44559	-3	9.54e-29
S. grandiflorus	67	43055	43121	F	43109	43175	-2	4.63e-27
S. grandiflorus	59	40263	40321	F	40440	40498	0	1.52e-26
S. grandiflorus	69	44302	44370	F	44329	44397	-3	2.06e-26
S. grandiflorus	69	44302	44370	F	44410	44478	-3	2.06e-26
S. grandiflorus	61	43595	43655	F	43676	43736	-1	1.74e-25
S. grandiflorus	57	44633	44689	F	44687	44743	0	2.44e-25
S. grandiflorus	64	42183	42246	F	42369	42432	-2	2.7e-25
S. grandiflorus	64	93679	93742	F	93739	93802	-2	2.7e-25
S. grandiflorus	60	43915	43974	F	44026	44085	-1	6.86e-25
S. grandiflorus	60	84028	84087	F	84085	84144	-1	6.86e-25
S. grandiflorus	60	84028	84087	P	118905	118964	-1	6.86e-25
S. grandiflorus	60	84085	84144	P	118962	119021	-1	6.86e-25
S. grandiflorus	60	118905	118964	F	118962	119021	-1	6.86e-25
S. grandiflorus	56	41063	41118	F	41120	41175	0	9.76e-25
S. grandiflorus	66	42966	43031	F	43110	43175	-3	1.15e-24
S. grandiflorus	62	42093	42154	F	42369	42430	-2	4.05e-24
S. grandiflorus	62	43840	43901	F	43861	43922	-2	4.05e-24
S. grandiflorus	54	32856	32909	F	32876	32929	0	1.56e-23
S. grandiflorus	64	42003	42066	F	42369	42432	-3	1.67e-23
S. grandiflorus	53	93745	93797	F	93775	93827	0	6.24e-23
S. grandiflorus	60	43996	44055	F	44026	44085	-3	3.52e-21
S. grandiflorus	50	73963	74012	F	74086	74135	0	4e-21
S. grandiflorus	50	73963	74012	P	128914	128963	0	4e-21
S. grandiflorus	50	74086	74135	P	129037	129086	0	4e-21
S. grandiflorus	50	128914	128963	F	129037	129086	0	4e-21
S. grandiflorus	53	41010	41062	F	41124	41176	-1	9.93e-21
S. grandiflorus	49	42554	42602	F	42590	42638	0	1.6e-20
S. grandiflorus	49	43019	43067	F	43127	43175	0	1.6e-20
S. grandiflorus	49	43091	43139	F	43127	43175	0	1.6e-20
S. grandiflorus	49	44302	44350	F	44518	44566	0	1.6e-20
S. grandiflorus	52	44319	44370	F	44346	44397	-1	3.9e-20
S. grandiflorus	55	42156	42210	F	42246	42300	-2	5.22e-20
S. grandiflorus	55	42294	42348	F	42342	42396	-2	5.22e-20
S. grandiflorus	48	42966	43013	F	43128	43175	0	6.39e-20
S. grandiflorus	54	44290	44343	F	44425	44478	-2	2.01e-19
S. grandiflorus	53	93685	93737	F	93775	93827	-2	7.74e-19
S. grandiflorus	53	93715	93767	F	93775	93827	-2	7.74e-19
S. grandiflorus	46	43637	43682	F	43691	43736	0	1.02e-18
S. grandiflorus	46	44433	44478	F	44514	44559	0	1.02e-18
S. grandiflorus	49	43073	43121	F	43127	43175	-1	2.35e-18
S. grandiflorus	52	22996	23047	F	23072	23123	-2	2.98e-18
S. grandiflorus	45	43339	43383	F	43399	43443	0	4.09e-18
S. grandiflorus	47	43429	43475	F	43501	43547	-1	3.61e-17
S. grandiflorus	53	44325	44377	F	44514	44566	-3	3.95e-17
S. grandiflorus	52	42273	42324	F	42345	42396	-3	1.49e-16
S. grandiflorus	52	44351	44402	F	44405	44456	-3	1.49e-16
S. grandiflorus	49	42018	42066	F	42384	42432	-2	1.69e-16
S. grandiflorus	49	42983	43031	F	43127	43175	-2	1.69e-16
S. grandiflorus	49	43037	43085	F	43127	43175	-2	1.69e-16
S. grandiflorus	49	43109	43157	F	43127	43175	-2	1.69e-16
S. grandiflorus	42	44302	44343	F	44437	44478	0	2.62e-16
S. grandiflorus	42	67416	67457	F	67521	67562	0	2.62e-16
S. grandiflorus	45	43339	43383	F	43471	43515	-1	5.52e-16
S. grandiflorus	51	41914	41964	F	41980	42030	-3	5.62e-16
S. grandiflorus	51	44379	44429	F	44433	44483	-3	5.62e-16
S. grandiflorus	51	44406	44456	F	44460	44510	-3	5.62e-16
S. grandiflorus	51	44433	44483	F	44487	44537	-3	5.62e-16
S. grandiflorus	50	43787	43836	F	43898	43947	-3	2.11e-15
S. grandiflorus	50	43787	43836	F	43979	44028	-3	2.11e-15
S. grandiflorus	40	54952	54991	F	72542	72581	0	4.19e-15
S. grandiflorus	40	54952	54991	P	130468	130507	0	4.19e-15
S. grandiflorus	49	94568	94616	F	94617	94665	-3	7.95e-15
S. grandiflorus	43	42204	42246	F	42390	42432	-1	8.45e-15
S. grandiflorus	47	44351	44397	F	44513	44559	-3	1.12e-13
S. grandiflorus	47	44378	44424	F	44513	44559	-3	1.12e-13
S. grandiflorus	41	42114	42154	F	42390	42430	-1	1.29e-13
S. grandiflorus	46	44325	44370	F	44406	44451	-3	4.19e-13
S. grandiflorus	46	44460	44505	F	44514	44559	-3	4.19e-13
S. grandiflorus	40	41925	41964	F	42081	42120	-1	5.03e-13
S. grandiflorus	40	41925	41964	F	42171	42210	-1	5.03e-13
S. grandiflorus	40	55053	55092	F	72727	72766	-1	5.03e-13
S. grandiflorus	40	55053	55092	P	130283	130322	-1	5.03e-13
S. grandiflorus	38	90459	90496	F	90492	90529	-1	7.64e-12
S. grandiflorus	38	90492	90529	P	112553	112590	-1	7.64e-12
S. grandiflorus	34	32856	32889	F	32896	32929	0	1.72e-11
S. grandiflorus	34	43595	43628	F	43703	43736	0	1.72e-11
S. grandiflorus	40	41991	42030	F	42261	42300	-2	2.94e-11
S. grandiflorus	33	118932	118964	F	118989	119021	0	6.87e-11
S. grandiflorus	42	44302	44343	F	44356	44397	-3	8.12e-11
S. grandiflorus	42	44302	44343	F	44383	44424	-3	8.12e-11
S. grandiflorus	42	44302	44343	F	44464	44505	-3	8.12e-11
S. grandiflorus	42	44302	44343	F	44491	44532	-3	8.12e-11
S. grandiflorus	42	53039	53080	F	53063	53104	-3	8.12e-11
S. grandiflorus	41	41925	41965	F	42261	42301	-3	3.02e-10
S. grandiflorus	38	43945	43982	F	43996	44033	-2	4.24e-10
S. grandiflorus	31	43871	43901	F	43892	43922	0	1.1e-09
S. grandiflorus	37	75202	75238	F	78097	78133	-2	1.61e-09
S. grandiflorus	37	75202	75238	P	124916	124952	-2	1.61e-09
S. grandiflorus	37	78097	78133	P	127811	127847	-2	1.61e-09
S. grandiflorus	37	124916	124952	F	127811	127847	-2	1.61e-09
S. grandiflorus	39	30103	30141	P	109937	109975	-3	4.14e-09
S. grandiflorus	30	31816	31845	F	73697	73726	0	4.39e-09
S. grandiflorus	30	31816	31845	P	129323	129352	0	4.39e-09
S. grandiflorus	30	42037	42066	F	42403	42432	0	4.39e-09
S. grandiflorus	30	42217	42246	F	42403	42432	0	4.39e-09
S. grandiflorus	36	35338	35373	F	35394	35429	-2	6.08e-09
S. grandiflorus	38	43915	43952	F	43945	43982	-3	1.53e-08
S. grandiflorus	32	41034	41065	F	41148	41179	-1	2.64e-08
S. grandiflorus	32	41933	41964	F	41999	42030	-1	2.64e-08
S. grandiflorus	32	41999	42030	F	42269	42300	-1	2.64e-08
S. grandiflorus	32	43447	43478	F	43519	43550	-1	2.64e-08
S. grandiflorus	32	44346	44377	F	44535	44566	-1	2.64e-08
S. grandiflorus	34	43949	43982	F	44030	44063	-2	8.67e-08
S. grandiflorus	31	42000	42030	F	42294	42324	-1	1.02e-07
S. grandiflorus	31	42000	42030	F	42318	42348	-1	1.02e-07
S. grandiflorus	31	42000	42030	F	42342	42372	-1	1.02e-07
S. grandiflorus	31	43001	43031	F	43145	43175	-1	1.02e-07
S. grandiflorus	31	43055	43085	F	43145	43175	-1	1.02e-07
S. grandiflorus	31	43127	43157	F	43145	43175	-1	1.02e-07
S. grandiflorus	36	25084	25119	F	27308	27343	-3	2.07e-07
S. grandiflorus	33	18031	18063	R	18031	18063	-2	3.26e-07
S. grandiflorus	30	42127	42156	F	42403	42432	-1	3.95e-07
S. grandiflorus	30	42966	42995	F	43146	43175	-1	3.95e-07
S. grandiflorus	30	43872	43901	F	43974	44003	-1	3.95e-07
S. grandiflorus	35	91961	91995	F	91973	92007	-3	7.58e-07
S. grandiflorus	32	41934	41965	F	42294	42325	-2	1.23e-06
S. grandiflorus	32	41934	41965	F	42318	42349	-2	1.23e-06
S. grandiflorus	32	41934	41965	F	42342	42373	-2	1.23e-06
S. grandiflorus	32	44290	44321	F	44452	44483	-2	1.23e-06
S. grandiflorus	34	67715	67748	F	81508	81541	-3	2.77e-06
S. grandiflorus	34	67715	67748	P	121508	121541	-3	2.77e-06
S. grandiflorus	31	41934	41964	F	42366	42396	-2	4.6e-06
S. grandiflorus	31	42093	42123	F	42297	42327	-2	4.6e-06
S. grandiflorus	31	42093	42123	F	42321	42351	-2	4.6e-06
S. grandiflorus	31	42093	42123	F	42345	42375	-2	4.6e-06
S. grandiflorus	31	42183	42213	F	42297	42327	-2	4.6e-06
S. grandiflorus	31	42183	42213	F	42321	42351	-2	4.6e-06
S. grandiflorus	31	42183	42213	F	42345	42375	-2	4.6e-06
S. grandiflorus	31	42273	42303	F	42369	42399	-2	4.6e-06
S. grandiflorus	31	42294	42324	F	42366	42396	-2	4.6e-06
S. grandiflorus	31	43850	43880	F	43892	43922	-2	4.6e-06
S. grandiflorus	31	73963	73993	F	74204	74234	-2	4.6e-06
S. grandiflorus	31	73963	73993	P	128815	128845	-2	4.6e-06
S. grandiflorus	31	74204	74234	P	129056	129086	-2	4.6e-06
S. grandiflorus	31	84062	84092	F	84119	84149	-2	4.6e-06
S. grandiflorus	31	84062	84092	P	118900	118930	-2	4.6e-06
S. grandiflorus	31	84119	84149	P	118957	118987	-2	4.6e-06
S. grandiflorus	31	128815	128845	F	129056	129086	-2	4.6e-06
S. grandiflorus	33	43804	43836	F	44026	44058	-3	1.01e-05
S. grandiflorus	30	28558	28587	R	77053	77082	-2	1.72e-05
S. grandiflorus	30	28558	28587	C	125967	125996	-2	1.72e-05
S. grandiflorus	30	75211	75240	F	78106	78135	-2	1.72e-05
S. grandiflorus	30	75211	75240	P	124914	124943	-2	1.72e-05
S. grandiflorus	30	78106	78135	P	127809	127838	-2	1.72e-05
S. grandiflorus	32	21710	21741	P	73697	73728	-3	3.68e-05
S. grandiflorus	32	21710	21741	F	129321	129352	-3	3.68e-05
S. grandiflorus	32	93676	93707	F	93796	93827	-3	3.68e-05
S. grandiflorus	31	22763	22793	P	71493	71523	-3	0.000133
S. grandiflorus	31	22763	22793	F	131526	131556	-3	0.000133
S. grandiflorus	31	43838	43868	F	43880	43910	-3	0.000133
S. grandiflorus	31	43919	43949	F	44060	44090	-3	0.000133
S. grandiflorus	31	44030	44060	F	44060	44090	-3	0.000133
S. grandiflorus	30	21712	21741	P	31816	31845	-3	0.000482
S. grandiflorus	30	23023	23052	F	23099	23128	-3	0.000482
S. grandiflorus	30	30119	30148	P	109930	109959	-3	0.000482
S. grandiflorus	30	42491	42520	F	42545	42574	-3	0.000482
S. grandiflorus	30	42542	42571	F	42569	42598	-3	0.000482
S. grandiflorus	30	42542	42571	F	42605	42634	-3	0.000482
S. grandiflorus	30	43783	43812	F	43873	43902	-3	0.000482
S. grandiflorus	30	43852	43881	F	43975	44004	-3	0.000482
S. grandiflorus	30	43996	44025	F	44056	44085	-3	0.000482
S. grandiflorus	30	44319	44348	F	44373	44402	-3	0.000482
S. grandiflorus	30	44346	44375	F	44454	44483	-3	0.000482
S. grandiflorus	30	44373	44402	F	44535	44564	-3	0.000482
S. grandiflorus	30	90457	90486	P	112530	112559	-3	0.000482
S. grandiflorus	30	94588	94617	F	94637	94666	-3	0.000482
S. grandiflorus	30	112532	112561	F	112565	112594	-3	0.000482
S. validus	21775	68877	90651	P	112675	134449	0	0
S. validus	401	55154	55554	F	72836	73236	-3	5.49e-224
S. validus	401	55154	55554	P	130090	130490	-3	5.49e-224
S. validus	256	34835	35090	P	108334	108589	-1	2.91e-142
S. validus	216	54806	55021	F	72401	72616	-1	2.97e-118
S. validus	216	54806	55021	P	130710	130925	-1	2.97e-118
S. validus	164	88928	89091	F	88978	89141	0	9.3e-90
S. validus	164	88928	89091	P	114185	114348	0	9.3e-90
S. validus	164	88978	89141	P	114235	114398	0	9.3e-90
S. validus	164	114185	114348	F	114235	114398	0	9.3e-90
S. validus	126	67451	67576	F	67472	67597	0	7.03e-67
S. validus	114	88928	89041	F	89028	89141	0	1.18e-59
S. validus	114	88928	89041	P	114185	114298	0	1.18e-59
S. validus	114	89028	89141	P	114285	114398	0	1.18e-59
S. validus	114	114185	114298	F	114285	114398	0	1.18e-59
S. validus	124	43015	43138	F	43087	43210	-3	9.41e-59
S. validus	105	67451	67555	F	67493	67597	0	3.09e-54
S. validus	101	74051	74151	F	74169	74269	0	7.91e-52
S. validus	101	74051	74151	P	129057	129157	0	7.91e-52
S. validus	101	74169	74269	P	129175	129275	0	7.91e-52
S. validus	101	129057	129157	F	129175	129275	0	7.91e-52
S. validus	109	40858	40966	F	40915	41023	-3	6.84e-50
S. validus	99	41903	42001	F	41984	42082	-3	5.36e-44
S. validus	94	55029	55122	F	72708	72801	-2	5.1e-43
S. validus	94	55029	55122	P	130525	130618	-2	5.1e-43
S. validus	84	67451	67534	F	67514	67597	0	1.36e-41
S. validus	92	44328	44419	F	44490	44581	-3	7.03e-40
S. validus	88	43105	43192	F	43123	43210	-2	1.83e-39
S. validus	84	41658	41741	F	41739	41822	-1	3.42e-39
S. validus	89	42954	43042	F	43170	43258	-3	4.07e-38
S. validus	84	42943	43026	F	43177	43260	-2	4.26e-37
S. validus	73	41669	41741	F	41750	41822	0	5.7e-35
S. validus	82	42943	43024	F	42961	43042	-3	5.2e-34
S. validus	82	42943	43024	F	43159	43240	-3	5.2e-34
S. validus	82	43033	43114	F	43141	43222	-3	5.2e-34
S. validus	82	43479	43560	F	43551	43632	-3	5.2e-34
S. validus	80	93844	93923	F	93874	93953	-3	7.72e-33
S. validus	76	42196	42271	F	42220	42295	-2	2.28e-32
S. validus	78	55011	55088	F	72690	72767	-3	1.14e-31
S. validus	78	55011	55088	P	130559	130636	-3	1.14e-31
S. validus	77	43044	43120	F	43170	43246	-3	4.4e-31
S. validus	64	41926	41989	F	42268	42331	0	1.49e-29
S. validus	64	88928	88991	F	89078	89141	0	1.49e-29
S. validus	64	88928	88991	P	114185	114248	0	1.49e-29
S. validus	64	89078	89141	P	114335	114398	0	1.49e-29
S. validus	64	114185	114248	F	114335	114398	0	1.49e-29
S. validus	63	67451	67513	F	67535	67597	0	5.98e-29
S. validus	70	42961	43030	F	42979	43048	-2	7.93e-29
S. validus	70	43069	43138	F	43141	43210	-2	7.93e-29
S. validus	70	43105	43174	F	43141	43210	-2	7.93e-29
S. validus	61	43680	43740	F	43707	43767	0	9.56e-28
S. validus	71	42924	42994	F	43050	43120	-3	1.41e-27
S. validus	71	42924	42994	F	43086	43156	-3	1.41e-27
S. validus	71	42997	43067	F	43069	43139	-3	1.41e-27
S. validus	71	42997	43067	F	43087	43157	-3	1.41e-27
S. validus	64	42979	43042	F	43195	43258	-1	2.87e-27
S. validus	60	84062	84121	F	84119	84178	0	3.82e-27
S. validus	60	84062	84121	P	119148	119207	0	3.82e-27
S. validus	60	84119	84178	P	119205	119264	0	3.82e-27
S. validus	60	119148	119207	F	119205	119264	0	3.82e-27
S. validus	70	42925	42994	F	43015	43084	-3	5.39e-27
S. validus	70	42979	43048	F	43177	43246	-3	5.39e-27
S. validus	70	43033	43102	F	43123	43192	-3	5.39e-27
S. validus	70	43105	43174	F	43159	43228	-3	5.39e-27
S. validus	63	39952	40014	F	40016	40078	-1	1.13e-26
S. validus	69	44432	44500	F	44459	44527	-3	2.06e-26
S. validus	61	43871	43931	F	43892	43952	-1	1.75e-25
S. validus	67	42028	42094	F	42127	42193	-3	3.02e-25
S. validus	60	93813	93872	F	93843	93902	-1	6.88e-25
S. validus	66	41914	41979	F	42094	42159	-3	1.15e-24
S. validus	66	41922	41987	F	42102	42167	-3	1.15e-24
S. validus	66	42943	43008	F	43195	43260	-3	1.15e-24
S. validus	65	42924	42988	F	42960	43024	-3	4.41e-24
S. validus	65	42924	42988	F	43158	43222	-3	4.41e-24
S. validus	65	42924	42988	F	43194	43258	-3	4.41e-24
S. validus	61	41941	42001	F	42022	42082	-2	1.57e-23
S. validus	64	42007	42070	F	42268	42331	-3	1.68e-23
S. validus	64	42943	43006	F	43069	43132	-3	1.68e-23
S. validus	64	42997	43060	F	43195	43258	-3	1.68e-23
S. validus	64	43033	43096	F	43069	43132	-3	1.68e-23
S. validus	64	43069	43132	F	43105	43168	-3	1.68e-23
S. validus	64	43087	43150	F	43105	43168	-3	1.68e-23
S. validus	63	44368	44430	F	44503	44565	-3	6.41e-23
S. validus	63	93814	93876	F	93874	93936	-3	6.41e-23
S. validus	59	42936	42994	F	43026	43084	-2	2.36e-22
S. validus	59	42936	42994	F	43098	43156	-2	2.36e-22
S. validus	59	43116	43174	F	43170	43228	-2	2.36e-22
S. validus	62	41826	41887	F	41892	41953	-3	2.44e-22
S. validus	62	42106	42167	F	42268	42329	-3	2.44e-22
S. validus	61	43925	43985	F	44006	44066	-3	9.29e-22
S. validus	61	44031	44091	F	44061	44121	-3	9.29e-22
S. validus	61	44651	44711	F	44705	44765	-3	9.29e-22
S. validus	60	39932	39991	F	39996	40055	-3	3.53e-21
S. validus	60	42990	43049	F	43008	43067	-3	3.53e-21
S. validus	59	43062	43120	F	43170	43228	-3	1.34e-20
S. validus	59	44341	44399	F	44368	44426	-3	1.34e-20
S. validus	56	40911	40966	F	40968	41023	-2	1.36e-20
S. validus	58	42003	42060	F	42102	42159	-3	5.1e-20
S. validus	57	43957	44013	F	44038	44094	-3	1.93e-19
S. validus	53	40858	40910	F	40972	41024	-2	7.77e-19
S. validus	53	43008	43060	F	43206	43258	-2	7.77e-19
S. validus	49	42489	42537	F	42525	42573	-1	2.36e-18
S. validus	52	22995	23046	F	23071	23122	-2	2.99e-18
S. validus	52	42925	42976	F	43105	43156	-2	2.99e-18
S. validus	52	43015	43066	F	43159	43210	-2	2.99e-18
S. validus	52	43033	43084	F	43159	43210	-2	2.99e-18
S. validus	52	43051	43102	F	43105	43156	-2	2.99e-18
S. validus	52	43069	43120	F	43195	43246	-2	2.99e-18
S. validus	45	93879	93923	F	93909	93953	0	4.11e-18
S. validus	48	42961	43008	F	43213	43260	-1	9.24e-18
S. validus	54	43944	43997	F	44025	44078	-3	1.05e-17
S. validus	54	44481	44534	F	44535	44588	-3	1.05e-17
S. validus	44	42458	42501	F	42485	42528	0	1.64e-17
S. validus	53	42924	42976	F	43122	43174	-3	3.96e-17
S. validus	53	42924	42976	F	43140	43192	-3	3.96e-17
S. validus	53	43134	43186	F	43170	43222	-3	3.96e-17
S. validus	53	43152	43204	F	43170	43222	-3	3.96e-17
S. validus	53	43170	43222	F	43188	43240	-3	3.96e-17
S. validus	50	73998	74047	F	74121	74170	-2	4.42e-17
S. validus	50	73998	74047	P	129156	129205	-2	4.42e-17
S. validus	50	74121	74170	P	129279	129328	-2	4.42e-17
S. validus	50	129156	129205	F	129279	129328	-2	4.42e-17
S. validus	52	42196	42247	F	42244	42295	-3	1.5e-16
S. validus	52	42925	42976	F	43033	43084	-3	1.5e-16
S. validus	52	42943	42994	F	43123	43174	-3	1.5e-16
S. validus	52	42943	42994	F	43141	43192	-3	1.5e-16
S. validus	52	42961	43012	F	42997	43048	-3	1.5e-16
S. validus	52	42979	43030	F	43069	43120	-3	1.5e-16
S. validus	52	43033	43084	F	43051	43102	-3	1.5e-16
S. validus	52	43033	43084	F	43177	43228	-3	1.5e-16
S. validus	52	43105	43156	F	43177	43228	-3	1.5e-16
S. validus	52	44368	44419	F	44395	44446	-3	1.5e-16
S. validus	52	44395	44446	F	44530	44581	-3	1.5e-16
S. validus	49	42022	42070	F	42283	42331	-2	1.7e-16
S. validus	49	43957	44005	F	44068	44116	-2	1.7e-16
S. validus	42	41960	42001	F	42041	42082	0	2.63e-16
S. validus	42	67451	67492	F	67556	67597	0	2.63e-16
S. validus	45	43424	43468	F	43556	43600	-1	5.54e-16
S. validus	41	43424	43464	F	43484	43524	0	1.05e-15
S. validus	47	42085	42131	F	42175	42221	-2	2.5e-15
S. validus	47	43514	43560	F	43586	43632	-2	2.5e-15
S. validus	40	54982	55021	F	72577	72616	0	4.21e-15
S. validus	40	54982	55021	P	130710	130749	0	4.21e-15
S. validus	49	41953	42001	F	42133	42181	-3	7.98e-15
S. validus	49	94702	94750	F	94751	94799	-3	7.98e-15
S. validus	46	43087	43132	F	43213	43258	-2	9.56e-15
S. validus	46	43195	43240	F	43213	43258	-2	9.56e-15
S. validus	48	43177	43224	F	43213	43260	-3	3e-14
S. validus	48	44373	44420	F	44481	44528	-3	3e-14
S. validus	45	93819	93863	F	93909	93953	-2	3.66e-14
S. validus	47	44347	44393	F	44482	44528	-3	1.12e-13
S. validus	47	44400	44446	F	44481	44527	-3	1.12e-13
S. validus	47	44482	44528	F	44509	44555	-3	1.12e-13
S. validus	37	42972	43008	F	43224	43260	0	2.69e-13
S. validus	46	42925	42970	F	42979	43024	-3	4.21e-13
S. validus	46	42925	42970	F	43213	43258	-3	4.21e-13
S. validus	46	42943	42988	F	43051	43096	-3	4.21e-13
S. validus	46	42961	43006	F	43015	43060	-3	4.21e-13
S. validus	46	42961	43006	F	43069	43114	-3	4.21e-13
S. validus	46	43015	43060	F	43051	43096	-3	4.21e-13
S. validus	46	43015	43060	F	43123	43168	-3	4.21e-13
S. validus	46	43069	43114	F	43123	43168	-3	4.21e-13
S. validus	46	44347	44392	F	44401	44446	-3	4.21e-13
S. validus	46	44347	44392	F	44536	44581	-3	4.21e-13
S. validus	46	44401	44446	F	44509	44554	-3	4.21e-13
S. validus	46	44509	44554	F	44536	44581	-3	4.21e-13
S. validus	40	41995	42034	F	42184	42223	-1	5.05e-13
S. validus	40	42462	42501	F	42525	42564	-1	5.05e-13
S. validus	40	43871	43910	F	43913	43952	-1	5.05e-13
S. validus	40	55083	55122	F	72762	72801	-1	5.05e-13
S. validus	40	55083	55122	P	130525	130564	-1	5.05e-13
S. validus	43	35325	35367	F	35381	35423	-2	5.34e-13
S. validus	45	44328	44372	F	44544	44588	-3	1.57e-12
S. validus	45	93849	93893	F	93909	93953	-3	1.57e-12
S. validus	38	41848	41885	F	42094	42131	-1	7.67e-12
S. validus	41	42972	43012	F	43008	43048	-2	7.76e-12
S. validus	34	32858	32891	F	32878	32911	0	1.72e-11
S. validus	34	43680	43713	F	43734	43767	0	1.72e-11
S. validus	43	41837	41879	F	41984	42026	-3	2.19e-11
S. validus	37	42235	42271	F	42259	42295	-1	2.99e-11
S. validus	37	42990	43026	F	43224	43260	-1	2.99e-11
S. validus	42	44432	44473	F	44486	44527	-3	8.15e-11
S. validus	32	41856	41887	F	41922	41953	0	2.76e-10
S. validus	32	42003	42034	F	42192	42223	0	2.76e-10
S. validus	41	41848	41888	F	42184	42224	-3	3.03e-10
S. validus	41	42936	42976	F	43008	43048	-3	3.03e-10
S. validus	41	42972	43012	F	43026	43066	-3	3.03e-10
S. validus	41	42972	43012	F	43098	43138	-3	3.03e-10
S. validus	41	43026	43066	F	43206	43246	-3	3.03e-10
S. validus	41	43080	43120	F	43170	43210	-3	3.03e-10
S. validus	41	43098	43138	F	43206	43246	-3	3.03e-10
S. validus	38	90593	90630	F	90626	90663	-2	4.26e-10
S. validus	38	90626	90663	P	112696	112733	-2	4.26e-10
S. validus	35	43206	43240	F	43224	43258	-1	4.52e-10
S. validus	35	43526	43560	F	43598	43632	-1	4.52e-10
S. validus	40	41914	41953	F	42184	42223	-3	1.12e-09
S. validus	37	42211	42247	F	42259	42295	-2	1.61e-09
S. validus	37	75237	75273	F	78131	78167	-2	1.61e-09
S. validus	37	75237	75273	P	125159	125195	-2	1.61e-09
S. validus	37	78131	78167	P	128053	128089	-2	1.61e-09
S. validus	37	125159	125195	F	128053	128089	-2	1.61e-09
S. validus	39	30102	30140	P	110081	110119	-3	4.15e-09
S. validus	39	44328	44366	F	44355	44393	-3	4.15e-09
S. validus	39	44328	44366	F	44382	44420	-3	4.15e-09
S. validus	39	44328	44366	F	44517	44555	-3	4.15e-09
S. validus	30	31815	31844	F	73732	73761	0	4.41e-09
S. validus	30	31815	31844	P	129565	129594	0	4.41e-09
S. validus	30	42041	42070	F	42302	42331	0	4.41e-09
S. validus	30	43195	43224	F	43231	43260	0	4.41e-09
S. validus	30	74018	74047	F	74141	74170	0	4.41e-09
S. validus	30	74018	74047	P	129156	129185	0	4.41e-09
S. validus	30	74141	74170	P	129279	129308	0	4.41e-09
S. validus	36	42509	42544	F	42545	42580	-2	6.1e-09
S. validus	36	43818	43853	F	44010	44045	-2	6.1e-09
S. validus	33	42062	42094	F	42161	42193	-1	6.82e-09
S. validus	38	41995	42032	F	42094	42131	-3	1.53e-08
S. validus	38	44328	44365	F	44409	44446	-3	1.53e-08
S. validus	38	44328	44365	F	44436	44473	-3	1.53e-08
S. validus	38	44328	44365	F	44463	44500	-3	1.53e-08
S. validus	38	53069	53106	F	53093	53130	-3	1.53e-08
S. validus	35	42133	42167	F	42295	42329	-2	2.31e-08
S. validus	35	42924	42958	F	43176	43210	-2	2.31e-08
S. validus	35	42936	42970	F	43224	43258	-2	2.31e-08
S. validus	35	42954	42988	F	43224	43258	-2	2.31e-08
S. validus	32	44312	44343	F	44420	44451	-1	2.65e-08
S. validus	32	44680	44711	F	44734	44765	-1	2.65e-08
S. validus	34	42919	42952	F	43225	43258	-2	8.7e-08
S. validus	34	42925	42958	F	42943	42976	-2	8.7e-08
S. validus	34	42925	42958	F	42997	43030	-2	8.7e-08
S. validus	34	42961	42994	F	43033	43066	-2	8.7e-08
S. validus	34	42961	42994	F	43105	43138	-2	8.7e-08
S. validus	34	42979	43012	F	43087	43120	-2	8.7e-08
S. validus	34	42979	43012	F	43141	43174	-2	8.7e-08
S. validus	34	43015	43048	F	43195	43228	-2	8.7e-08
S. validus	34	43051	43084	F	43069	43102	-2	8.7e-08
S. validus	34	43069	43102	F	43159	43192	-2	8.7e-08
S. validus	34	43159	43192	F	43213	43246	-2	8.7e-08
S. validus	31	41857	41887	F	42265	42295	-1	1.03e-07
S. validus	31	42004	42034	F	42217	42247	-1	1.03e-07
S. validus	36	25083	25118	F	27307	27342	-3	2.08e-07
S. validus	36	43818	43853	F	43929	43964	-3	2.08e-07
S. validus	33	18030	18062	R	18030	18062	-2	3.27e-07
S. validus	33	44340	44372	F	44556	44588	-2	3.27e-07
S. validus	33	44502	44534	F	44556	44588	-2	3.27e-07
S. validus	30	43882	43911	F	44005	44034	-1	3.97e-07
S. validus	30	43903	43932	F	44005	44034	-1	3.97e-07
S. validus	35	42990	43024	F	43026	43060	-3	7.61e-07
S. validus	35	42990	43024	F	43098	43132	-3	7.61e-07
S. validus	35	43033	43067	F	43087	43121	-3	7.61e-07
S. validus	35	43080	43114	F	43224	43258	-3	7.61e-07
S. validus	35	92095	92129	F	92107	92141	-3	7.61e-07
S. validus	32	40882	40913	F	40996	41027	-2	1.23e-06
S. validus	32	41856	41887	F	42003	42034	-2	1.23e-06
S. validus	32	41857	41888	F	42241	42272	-2	1.23e-06
S. validus	32	41922	41953	F	42192	42223	-2	1.23e-06
S. validus	34	42925	42958	F	43069	43102	-3	2.78e-06
S. validus	34	42943	42976	F	43087	43120	-3	2.78e-06
S. validus	34	42979	43012	F	43051	43084	-3	2.78e-06
S. validus	34	42979	43012	F	43123	43156	-3	2.78e-06
S. validus	34	42997	43030	F	43141	43174	-3	2.78e-06
S. validus	34	42997	43030	F	43159	43192	-3	2.78e-06
S. validus	34	43015	43048	F	43177	43210	-3	2.78e-06
S. validus	34	43033	43066	F	43195	43228	-3	2.78e-06
S. validus	34	43051	43084	F	43213	43246	-3	2.78e-06
S. validus	34	43105	43138	F	43195	43228	-3	2.78e-06
S. validus	34	43123	43156	F	43213	43246	-3	2.78e-06
S. validus	34	43950	43983	F	43980	44013	-3	2.78e-06
S. validus	34	43980	44013	F	44031	44064	-3	2.78e-06
S. validus	34	67750	67783	F	81542	81575	-3	2.78e-06
S. validus	34	67750	67783	P	121751	121784	-3	2.78e-06
S. validus	31	41926	41956	F	42244	42274	-2	4.61e-06
S. validus	31	42007	42037	F	42244	42274	-2	4.61e-06
S. validus	31	73998	74028	F	74239	74269	-2	4.61e-06
S. validus	31	73998	74028	P	129057	129087	-2	4.61e-06
S. validus	31	74239	74269	P	129298	129328	-2	4.61e-06
S. validus	31	129057	129087	F	129298	129328	-2	4.61e-06
S. validus	33	43835	43867	F	43976	44008	-3	1.02e-05
S. validus	30	42070	42099	F	42169	42198	-2	1.73e-05
S. validus	30	42341	42370	F	42350	42379	-2	1.73e-05
S. validus	30	43069	43098	F	43231	43260	-2	1.73e-05
S. validus	30	43141	43170	F	43231	43260	-2	1.73e-05
S. validus	30	75246	75275	F	78140	78169	-2	1.73e-05
S. validus	30	75246	75275	P	125157	125186	-2	1.73e-05
S. validus	30	78140	78169	P	128051	128080	-2	1.73e-05
S. validus	32	21709	21740	P	73732	73763	-3	3.69e-05
S. validus	32	21709	21740	F	129563	129594	-3	3.69e-05
S. validus	32	40939	40970	F	40996	41027	-3	3.69e-05
S. validus	32	41857	41888	F	42217	42248	-3	3.69e-05
S. validus	31	22762	22792	P	71528	71558	-3	0.000134
S. validus	31	22762	22792	F	131768	131798	-3	0.000134
S. validus	31	41926	41956	F	42220	42250	-3	0.000134
S. validus	31	42106	42136	F	42244	42274	-3	0.000134
S. validus	31	42196	42226	F	42268	42298	-3	0.000134
S. validus	31	43954	43984	F	44095	44125	-3	0.000134
S. validus	31	44031	44061	F	44091	44121	-3	0.000134
S. validus	30	21711	21740	P	31815	31844	-3	0.000483
S. validus	30	23022	23051	F	23098	23127	-3	0.000483
S. validus	30	28557	28586	R	77088	77117	-3	0.000483
S. validus	30	28557	28586	C	126209	126238	-3	0.000483
S. validus	30	30118	30147	P	110074	110103	-3	0.000483
S. validus	30	42450	42479	F	42540	42569	-3	0.000483
S. validus	30	43051	43080	F	43231	43260	-3	0.000483
S. validus	30	43123	43152	F	43231	43260	-3	0.000483
S. validus	30	43177	43206	F	43231	43260	-3	0.000483
S. validus	30	43814	43843	F	43883	43912	-3	0.000483
S. validus	30	43814	43843	F	43904	43933	-3	0.000483
S. validus	30	44395	44424	F	44422	44451	-3	0.000483
S. validus	30	44395	44424	F	44449	44478	-3	0.000483
S. validus	30	44422	44451	F	44530	44559	-3	0.000483
S. validus	30	44449	44478	F	44530	44559	-3	0.000483
S. validus	30	94722	94751	F	94771	94800	-3	0.000483
Note. F: forward repeat, P: palindromic repeat, C: complementary repeat, R: reverse repeat
